# Supplementary material for: PortUrb: a performance portable, high-order, moist atmospheric large eddy simulation model with variable-friction immersed boundaries
Source: Copernicus journal article supplement (doi:10.5194/gmd-18-9605-2025), 2025-12-04
Supplement: Supplementary file [file gmd-18-9605-2025-supplement-title-page.pdf › gmd-18-9605-2025-supplement-title-page.pdf]

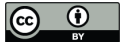

## *Supplement of*

# **PortUrb: a performance portable, high-order, moist atmospheric large eddy simulation model with variable-friction immersed boundaries**

**Matthew Norman et al.**

*Correspondence to:* Matthew Norman ([normanmr@ornl.gov](mailto:normanmr@ornl.gov))

- `gmd-18-9605-2025-supplement-title-page.pdf`
- `portUrb-main`
  - `.gitmodules`
  - `LICENSE`
  - `README.md`
  - `build`
    - \* `analyze.py`
    - \* `cmakeclean.sh`
    - \* `cmakescript.sh`
    - \* `launchers`
    - \* `machines`
    - \* `postproc`
    - \* `supercell_norms.py`
    - \* `test.sh`
  - `experiments`
    - \* `examples`
  - `external`
    - \* `WGS84toCartesian`
    - \* `YAKL`
    - \* `kokkos`
    - \* `ponni`
    - \* `yaml-cpp`
  - `model`
    - \* `CMakeLists.txt`
    - \* `core`
    - \* `main_header.h`
    - \* `modules`

The copyright of individual parts of the supplement might differ from the article licence.
